# Supplementary material for: Blocking negative effects of senescence in human skin fibroblasts with a plant extract
Source: Springer Nature journal article supplement (doi:10.1038/s41514-018-0023-5), 2018-04-11

# Analysis Comparison 1

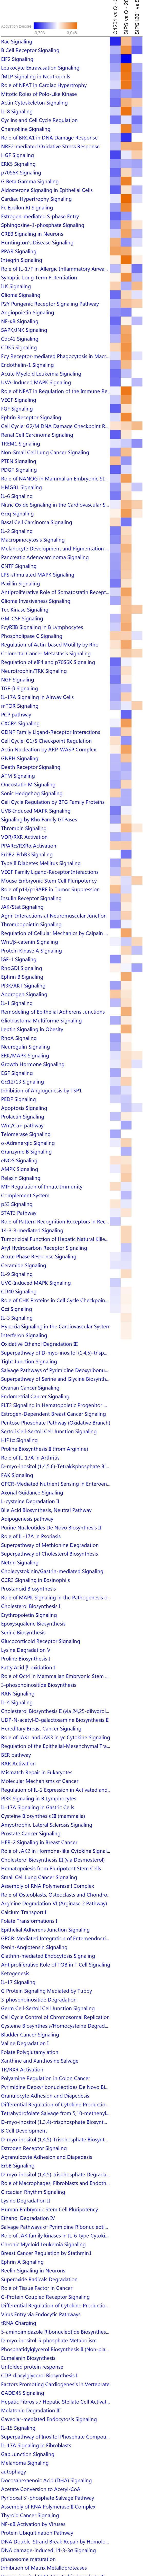

Supplement: MOESM3 [file 41514_2018_23_MOESM3_ESM.pdf › 41514_2018_23_MOESM3_ESM.pdf]
